# Supplementary material for: Integrative Analysis From Multicenter Studies Identifies a WGCNA-Derived Cancer-Associated Fibroblast Signature for Ovarian Cancer
Source: PubMed Central journal article supplement (PMC9304893; doi:10.3389/fimmu.2022.951582), 2022-07-08

# GPL96

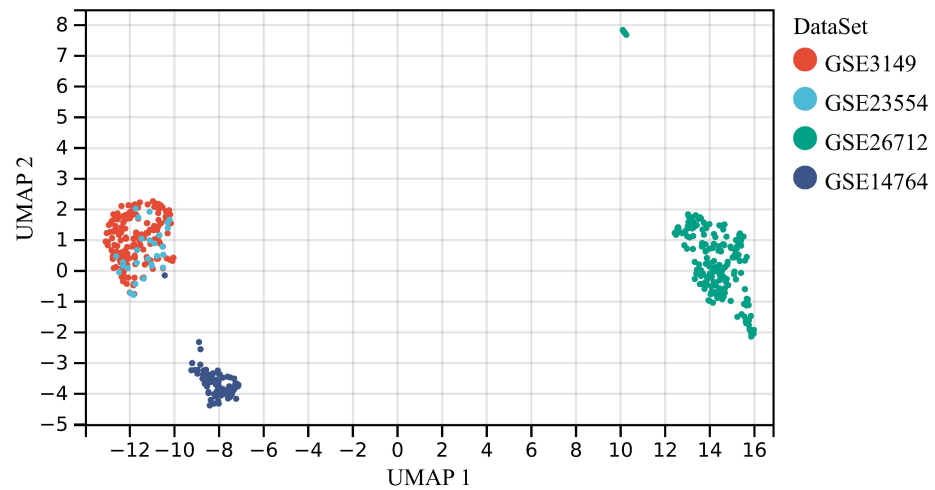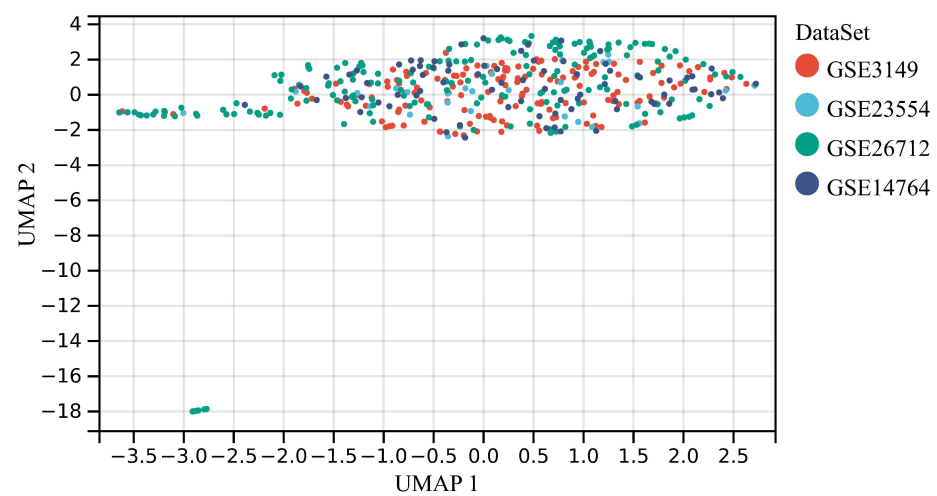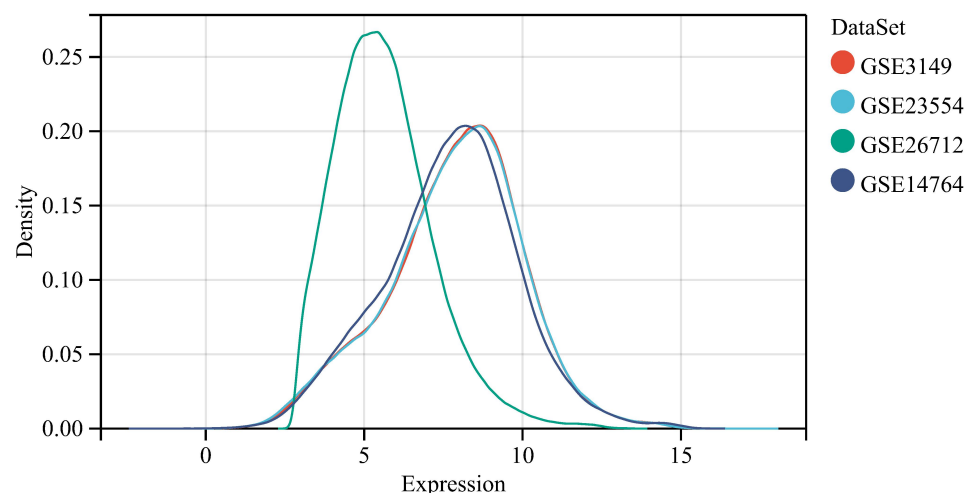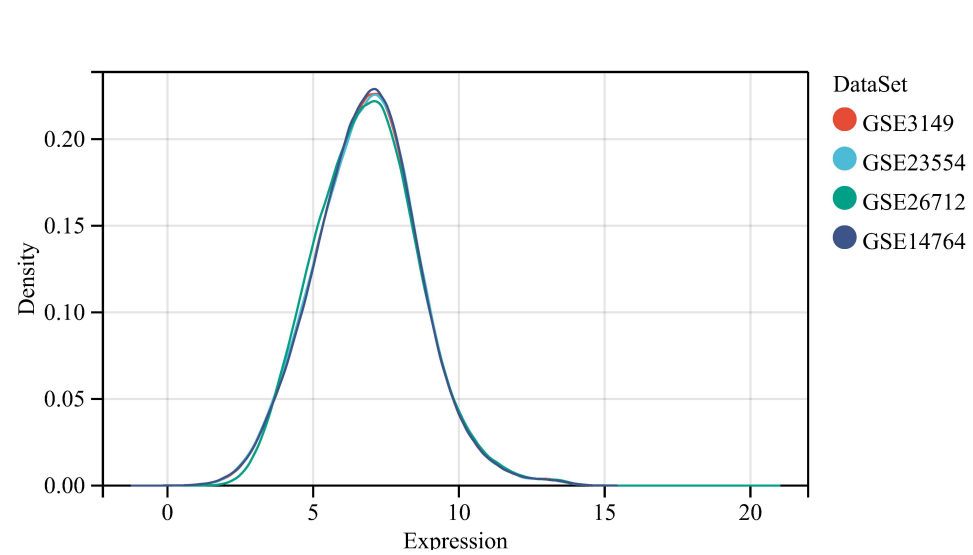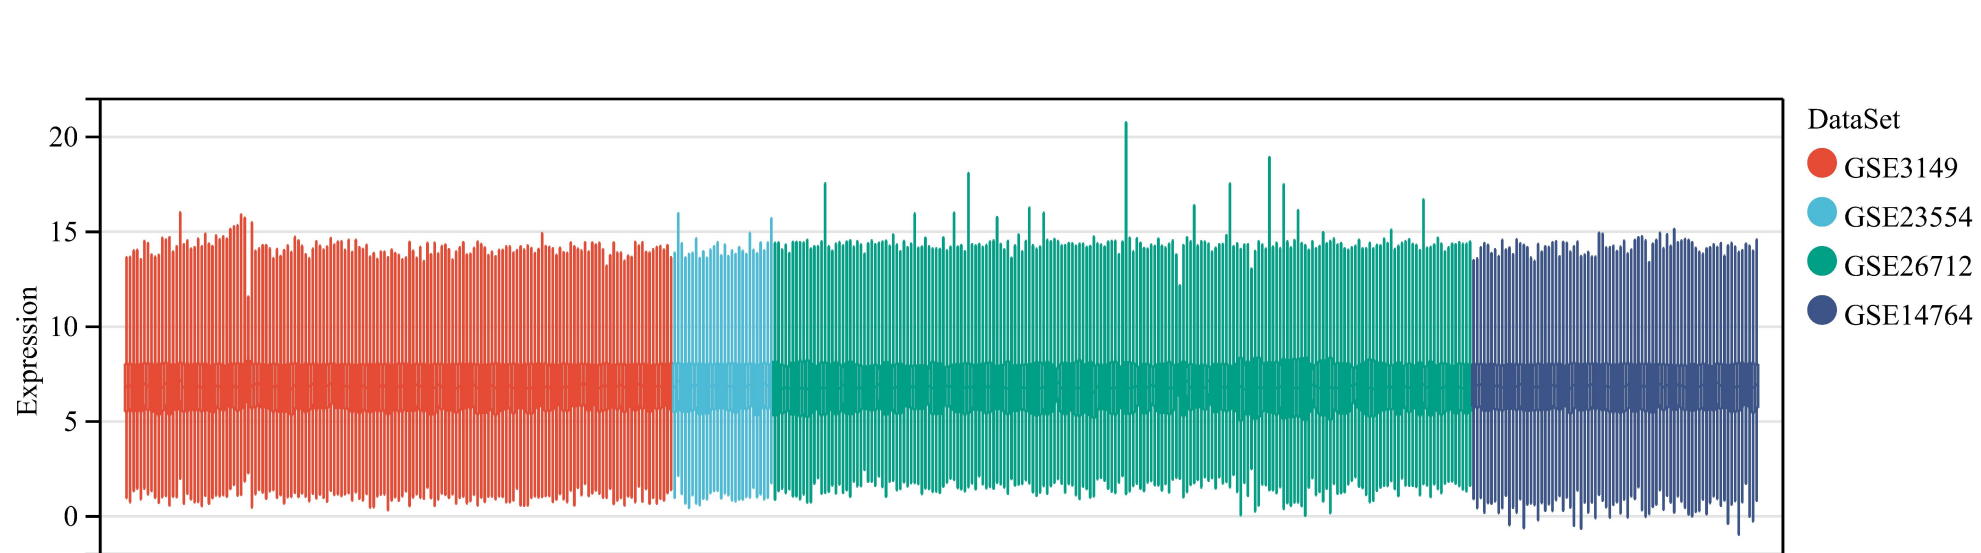

Supplement: DataSheet_1.pdf [file DataSheet_1.pdf]
