# Supplementary material for: Integrative Analysis From Multicenter Studies Identifies a WGCNA-Derived Cancer-Associated Fibroblast Signature for Ovarian Cancer
Source: PubMed Central journal article supplement (PMC9304893; doi:10.3389/fimmu.2022.951582), 2022-07-08
Supplement: DataSheet_2.pdf [file DataSheet_2.pdf]

Intersection Size

60  
40  
20  
0

2

3

4

2

6

4

3

71

GPL14951  
GPL7759  
GPL2986  
GPL96  
TCGA  
GPL570

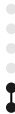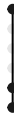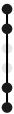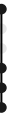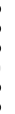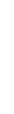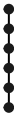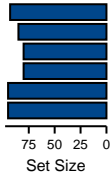

75 50 25 0

Set Size
